# Supplementary material for: Carbon nanofibers derived from cellulose nanofibers as a long-life anode material for rechargeable sodium-ion batteries
Source: Royal Society of Chemistry journal article supplement (doi:10.1039/c3ta12389h), 2013-01-01
Supplement: c3ta12389h.pdf [file c3ta12389h.pdf]

## *Supplementary Information*

# **Cellulose nanofibers derived carbon nanofibers as a long-life anode material for rechargeable sodium-ion batteries**

**Wei Luo,<sup>a</sup> Jenna Schardt,<sup>b</sup> Clement Bommier,<sup>a</sup> Bao Wang,<sup>a</sup> Joshua Razink,<sup>c</sup>  
John Simonsen,<sup>\*b</sup> and Xiulei Ji<sup>\*a</sup>**

<sup>a</sup>*Department of Chemistry, Oregon State University, Corvallis, OR 97331, USA,*

E-mail: david.ji@oregonstate.edu

<sup>b</sup>*Department of Wood Science and Engineering, Oregon State University, Corvallis, OR 97331, USA, E-mail: john.simonsen@oregonstate.edu*

<sup>c</sup>*CAMCOR, Department of Chemistry, University of Oregon, Eugene, OR 97403, USA.*

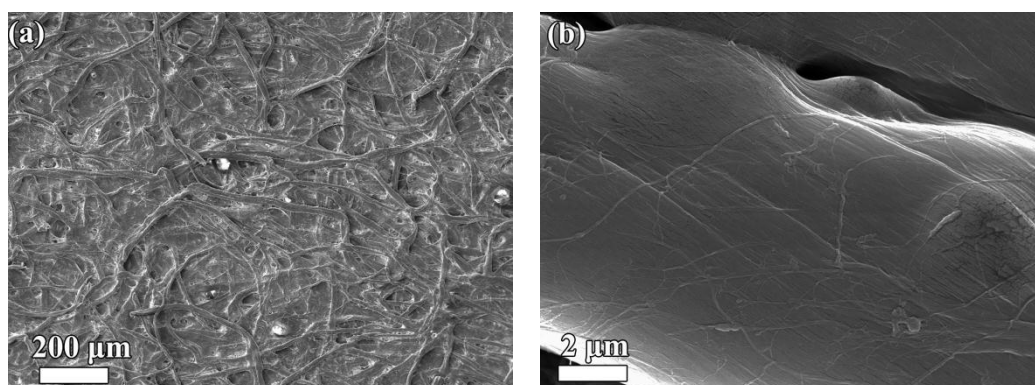

**Fig. S1** (a, b) FESEM images of cellulose filter paper. The cellulose filter paper (qualitative #1005070, Whatman) was used as received without further treatment.

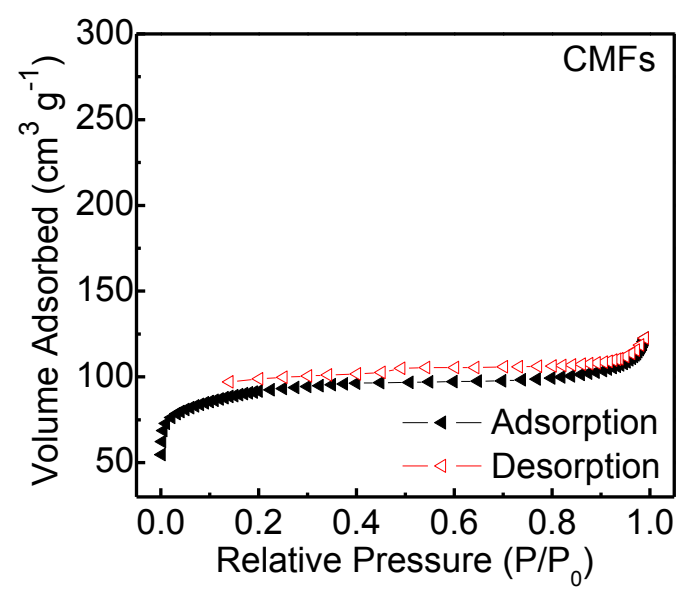

Fig. S2  $\text{N}_2$  nitrogen adsorption and desorption isotherm of CMFs.
